# Supplementary material
Source: PubMed Central journal article supplement (PMC6097916)

Supplemental Figure 1

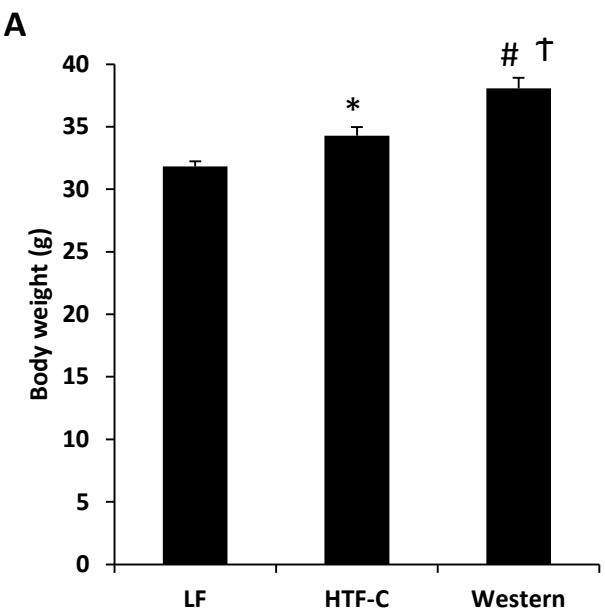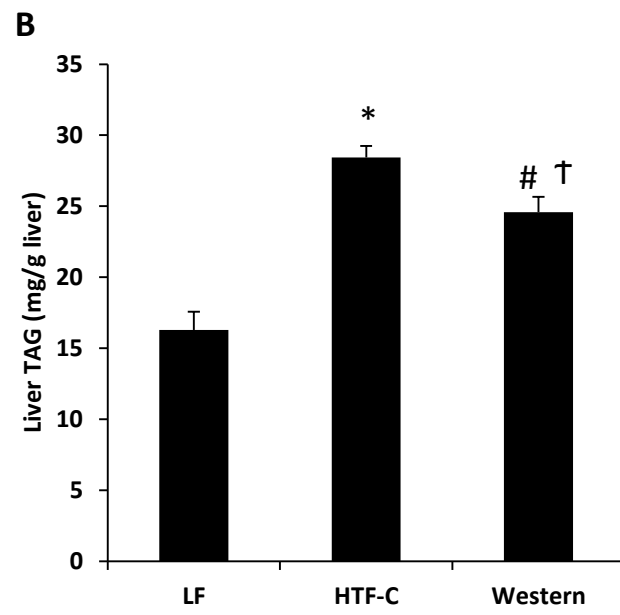

# Supplemental Figure 2

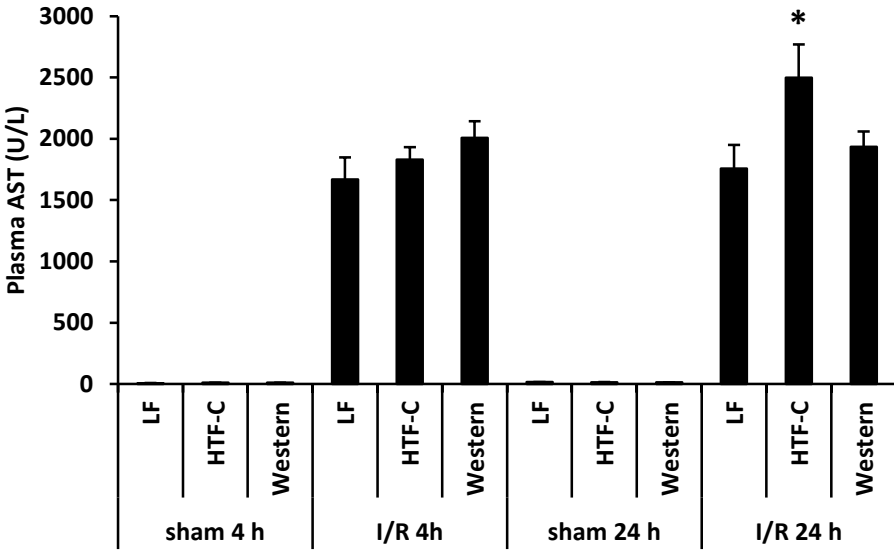

**Supplemental Figure 3**

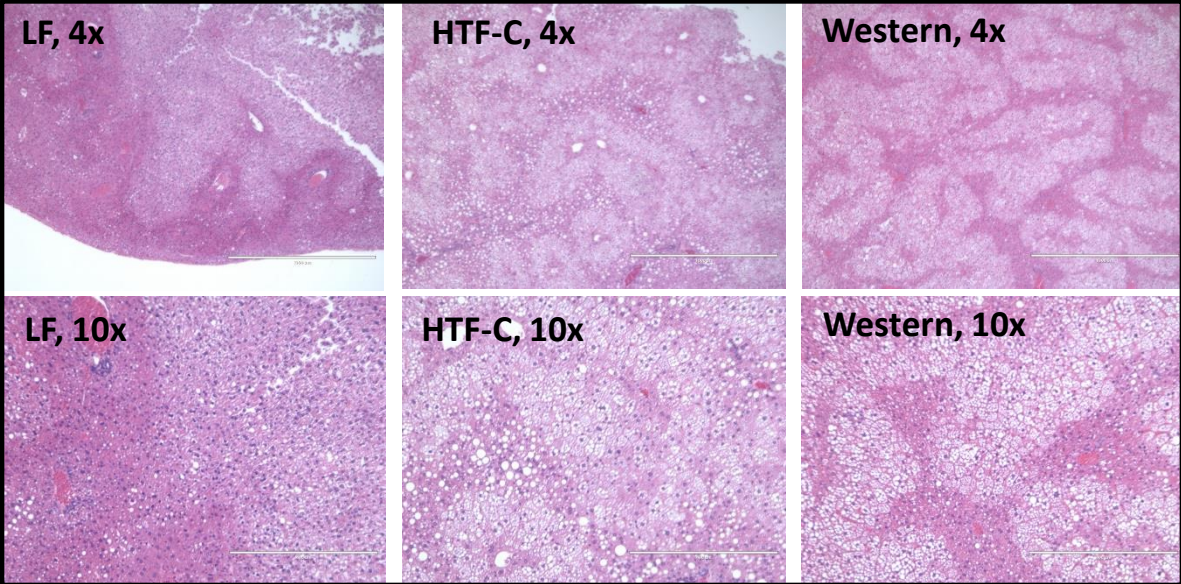

Supplement: NIHMS963491-supplement-supplemental_figures.pdf [file NIHMS963491-supplement-supplemental_figures.pdf]
